# Supplementary material for: Vision in two cyprinid fish: implications for collective behavior
Source: PeerJ. 2015 Aug 4;3:e1113. doi: 10.7717/peerj.1113 (PMC4540049; doi:10.7717/peerj.1113)
Supplement: Data S1 [file peerj-03-1113-s004.xlsx]

## Sheet: Acuity & Eye Measurements
Species	Zebrafish	Zebrafish	Zebrafish	Golden Shiner	Golden Shiner	Golden Shiner
Subject ID	105	106	107	1315	1318	1325
Eye	Left	Right	Right	Right	Right	Left
Fish Total Length (cm)	4.1	4.3	4.1	7.3	7.5	7.4
Total Retinal Sites Sampled	391	151	154	158	152	198
Sites Counted	258 out of 391	111 out of 151	80 out of 154	128 out of 158	81 out of 152	128 out of 197
Percent of Sites Counted	0.659847	0.735099	0.519481	0.810127	0.532895	0.649746
Total Sites Counted	258	111	80	128	81	128
AVE Total Sites Counted	149.667			112.333
Sum of Total RGC's	13870	5949	4162	2774	2869	3003
Schaeffer Coefficient (CE)	0.0085	0.0038	0.0041	0.0024	0.0031	0.003
Shrinkage	0.02963	0.162857	0.012384	0.0752	0.0443	0.2669
Peak Density (cells/mm^2)	37683	35430	35560	13657	16853	12629
Min Density (cells/mm^2)	8547	6192	5136	1845	3830	1894
Peak Acuity (cycles per degree)	1.93	1.87	1.87	2.79	3.1	2.69
Min Acuity (cycles per degree)	0.92	0.78	0.71	1.03	1.48	1.04
Lens Diameter (mm)	0.9	0.8	0.8	2	2	2
Axial Length (mm)	1.16	1.39	1.51	3.2	2.8	3.6
Transverse Diameter (mm)	1.86	2	1.88	4.5	4.2	4.9
Corneal Diameter (mm)	1.01	1.11	1.18	4.03	3.6	4.6
