# Supplementary material for: Vision in two cyprinid fish: implications for collective behavior
Source: PeerJ. 2015 Aug 4;3:e1113. doi: 10.7717/peerj.1113 (PMC4540049; doi:10.7717/peerj.1113)
Supplement: Data S2 [file peerj-03-1113-s005.xlsx]

## Sheet: Retina Coordinates
Fish ID	Eye	Type	rad	r	Θ	standardized (d)	x-coor	y-coor	Quadrant
GOSH 1315	Right	Wholemount	233.333	65.896	244	0.282412	-0.123801	-0.25383	Ventro-Temporal
GOSH 1318	Right	Wholemount	164	30.302	225	0.184768	-0.130651	-0.130651	Ventro-Temporal		Position of Center of Acute Vision
GOSH 1325	Left	Wholemount	155	40.139	329	0.258961	0.221973	-0.133375	Ventro-Temporal
											ZBFI
ZBFI 105	Left	Wholemount	208	174	360	0.836538	0.836538	-2.04977e-16	Ventro-Temporal			x-coor	y-coor
ZBFI 106	Right	Wholemount	181	116	216	0.640884	-0.518486	-0.376702	Ventro-Temporal		AVE	-0.0969112	-0.207556
ZBFI 107	Right	Wholemount	196	128.693	202	0.656597	-0.608786	-0.245966	Ventro-Temporal		SE	-0.0559517	0.110427
											GOSH
												x-coor	y-coor
											AVE	-0.0108263	-0.172619
											SE	0.116417	0.0406133
GOSH 1315	Right	Wholemount	233.333	65.896	244	0.282412	-0.123801	-0.25383	Ventro-Temporal	SE for Wholemounts (GOSH)			SE for Wholemounts (ZBFI)
GOSH 1318	Right	Wholemount	164	30.302	225	0.184768	-0.130651	-0.130651	Ventro-Temporal	31.9739	Θ		50.4953	Θ
GOSH 1325	Left	Wholemount	155	40.139	329	0.258961	0.221973	-0.133375	Ventro-Temporal	0.116417	x-coor		0.467452	x-coor
ZBFI 105	Left	Wholemount	208	174	360	0.836538	0.836538	-2.04977e-16	Ventro-Temporal	0.0406133	y-coor		0.110427	y-coor
ZBFI 106	Right	Wholemount	181	116	216	0.640884	-0.518486	-0.376702	Ventro-Temporal	0.0294286	standardized (d)		0.0627635	standardized (d)
ZBFI 107	Right	Wholemount	196	128.693	202	0.656597	-0.608786	-0.245966	Ventro-Temporal
