# Supplementary material for: Vision in two cyprinid fish: implications for collective behavior
Source: PeerJ. 2015 Aug 4;3:e1113. doi: 10.7717/peerj.1113 (PMC4540049; doi:10.7717/peerj.1113)
Supplement: Data S3 [file peerj-03-1113-s006.xlsx]

## Sheet: Visual Field
	Binocular Field Width (ZEBRAFISH)											Binocular Field Width (GOLDEN SHINERS)
Elevation	ZBFI (104)	ZBFI (105)	ZBFI (106)	ZBFI (107)	ZBFI (108)		AVERAGE	SE			Elevation	GOSH (1307)	GOSH (1308)	GOSH (1309)	GOSH (1310)	GOSH (1311)	GOSH (1312)	GOSH (1313)	GOSH (1314)	GOSH (1317)		AVERAGE	SE
150	20.1306	29.1129	28.1152	34.1001	30.1105		28.3139	2.28421			150	16.2666	16.2666	24.2428	31.213	28.2268	26.2352	52.0743	27.2311	15.2688		26.3361	3.76438
140	31.108	30.1105	31.108	34.1001	33.1028		31.9059	0.732928			140	19.259	26.2352	33.203	38.1749	32.2081	28.2268	51.0825	31.213	17.2642		30.763	3.36971
130	28.1152	27.1175	32.1055	37.0914	33.1028		31.5065	1.80087			130	22.2498	28.2268	28.2268	38.1749	34.1977	27.2311	49.0985	32.2081	17.2642		30.7642	3.08455
120	28.1152	27.1175	35.0973	37.0914	35.0973		32.5037	2.03434			120	22.2498	28.2268	31.213	37.1808	35.1922	28.2268	42.1494	40.1625	26.2352		32.3152	2.24588
110	32.1055	26.1196	33.1028	37.0914	35.0973		32.7033	1.85538			110	23.2464	26.2352	35.1922	37.1808	35.1922	30.2178	31.213	40.1625	34.1977		32.5375	1.78626
100	22.1273	22.1273	31.108	29.1129	36.0944		28.114	2.69565			100	20.2561	24.2428	31.213	35.1922	35.1922	31.213	34.1977	37.1808	31.213		31.1001	1.84358
90	39.0852	21.129	31.108	31.108	41.0786		32.7018	3.53503			90	23.2464	22.2498	28.2268	36.1866	35.1922	34.1977	31.213	32.2081	32.2081		30.5476	1.66749
80	37.0914	15.1374	31.108	32.1055	42.0752		31.5035	4.53516			80	33.203	27.2311	34.1977	35.1922	35.1922	34.1977	33.203	32.2081	32.2081		32.9814	0.80876
70	30.1105	15.1374	33.1028	35.0973	36.0944		29.9085	3.83156			70	31.213	25.2391	31.213	35.1922	34.1977	31.213	36.1866	30.2178	34.1977		32.0967	1.10578
60	31.108	15.1374	35.0973	36.0944	37.0914		30.9057	4.07084			60	31.213	20.2561	32.2081	35.1922	35.1922	30.2178	34.1977	34.1977	34.1977		31.8747	1.56563
50	31.108	17.135	28.1152	29.1129	38.0883		28.7119	3.37788			50	33.203	15.2688	30.2178	37.1808	35.1922	29.2224	35.1922	36.1866	35.1922		31.8729	2.2579
40	30.1105	17.135	26.1196	25.1216	34.1001		26.5174	2.83324			40	40.1625	13.2727	28.2268	37.1808	36.1866	29.2224	35.1922	36.1866	36.1866		32.4241	2.70618
30	7.14381	17.135	26.1196	21.129	32.1055		20.7266	4.2197			30	38.1749	14.2708	28.2268	31.213	37.1808	28.2268	36.1866	38.1749	28.2268		31.0979	2.55755
20	7.14381	5.14453	11.1413	16.1362	20		11.9132	2.76033			20	38.1749	15.2688	27.2311	30.2178	37.1808	28.2268	27.2311	38.1749	27.2311		29.8819	2.43897
10	5.14453	5	6	17.135	15		9.6559	2.64472			10	32.2081	13.2727	27.2311	31.213	36.1866	26.2352	26.2352	36.1866	27.2311		28.4444	2.31121
0	3	6	3	6.14421	8		5.22884	0.975894			0	30.2178	9.27835	20.2561	30.2178	38.1749	23.2464	20.2561	23.2464	24.2428		24.3485	2.69545
350	-14.8674	-28.8962	-5.85772	-8.86016	-10		-13.6963	4.06757			350	28.2268	10	16.2666	31.213	33.203	26.2352	20.2561	22.2498	12.2744		22.2139	2.74177
340	-12.8646	-28.8962	-7.85926	-11.8634	-25		-17.2967	4.07504			340	21.253	8	2.28158	16.2666	29.2224	21.253	18.2617	21.253	12.2744		16.674	2.69976
330	-18.8739	-28.8962	-8.86016	-11.8634	-26		-18.8987	3.87716			330	15.2688	10	5.28124	17.2642	22.2498	8.27934	18.2617	19.259	2.28158		13.1273	2.30143
320	-18.8739	-28.8962	-10.8622	-12.8646	-15		-17.2994	3.1887			320	7.28014	12	9	10	18.2617	4	13.2727	2.28158	5		9.01068	1.67965
310	-18.8739	-28.8962	-18.8739	-18.8739	-19		-20.9036	1.9983			310	-3.72244	-11.7375	-16.7525	-16.7525	2.28158	-1.7204	-17.756	-6.72678	-24.7853		-10.8524	2.97196
300	-18.8739	-29.8989	-29.8989	-16.8705	-15		-22.1084	3.23891			300	-11.7375	-27.8004	-12.7401	-15.7491	-4.72371	-17.756	-16.7525	-7.72858	-30.817		-16.2005	2.85412
290	-37.9234	-26	-28.8962	-12.8646	-25		-26.1368	4.02492			290	-20.7675	-27.8004	-27.8004	-16.7525	-7.72858	-18.7597	-29.8113	-5.72516	-33.8351		-20.9979	3.26479
280	-33.9105	-25	-26.8911	-13.866	-25		-24.9335	3.2165			280	-21.7717	-27.8004	-28.8058	-23.7806	-19.7635	-30.817	-27.8004	-25.7902	-27.8004		-26.0145	1.19339
270	-28	-24	-18	-20	-15		-21	2.28035			270	-18.7597	-29.8113	-27.8004	-26.7952	-21.7717	-26.7952	-22.7761	-22.7761	-27.8004		-25.0096	1.20493
260	2	4	6	3	4		3.8	0.663325			260	2.28158	2.28158	2.28158	2.28158	2.28158	2.28158	2.28158	2.28158	3		2.3614	0.0798247
250	4	7	8	1	4		4.8	1.24097			250	2.28158	2.28158	2.28158	2.28158	2.28158	2.28158	2.28158	2.28158	2		2.25029	0.0312864
240	3	5	7	4	7		5.2	0.8			240	2.28158	2.28158	2.28158	2.28158	2.28158	2.28158	2.28158	2.28158	3		2.3614	0.0798247
230	3	6	8	7	6		6	0.83666			230	2.28158	2.28158	2.28158	2.28158	2.28158	2.28158	2.28158	2.28158	8		2.91696	0.63538
220	4	13	10	13	4		8.8	2.0347			220	22.2498	4	27.2311	8	8	10.2772	22.2498	12.2744	13.2727		14.1728	2.63596
210	9.14274	9	12	21.129	12		12.6543	2.21767			210	23.2464	2	8.27934	8	6	12.2744	27.2311	4.28153	9.27835		11.1768	2.85109
200	11.1413	9	14	21.129	10		13.0541	2.18541			200	21.253	2.28158	12.2744	6.28078	8.27934	12.2744	35.1922	12.2744	14.2708		13.8201	3.20604
190	11.1413	6	19.1322	24.1236	12		14.4794	3.19256			190	15.2688	10.2772	17.2642	9.27835	14.2708	15.2688	42.1494	16.2666	14.2708		17.1461	3.24598
180	15.1374	17.135	21.129	27.1175	11.1413		18.332	2.72352			180	12.2744	15.2688	19.259	19.259	22.2498	19.259	48.1063	20.2561	18.2617		21.5771	3.45495
170	16.1362	25.1216	23.1255	26.1196	16.1362		21.3278	2.1736			170	12.2744	22.2498	26.2352	24.2428	22.2498	22.2498	52.0743	29.2224	19.259		25.5619	3.66609
160	20.1306	31.108	27.1175	30.1105	27.1175		27.1168	1.91963			160	16.2666	21.253	26.2352	30.2178	22.2498	23.2464	50.0906	23.2464	16.2666		25.4525	3.40902
